# Supplementary material for: Pellino 1 promotes lymphomagenesis by deregulating BCL6 polyubiquitination
Source: JCI journal article supplement (doi:10.1172/jci75667), 2014-10-07
Supplement: sd1 [file 1]

## Supplementary Methods

### Cell lines

DLBCL cell lines (SU-DHL9, SU-DHL4, DOHH2, and PFEIFFER), the Mantle lymphoma cell line (Rec1), and Burkitt lymphoma cell lines (Daudi, Ramos, BJAB, and Raji) were maintained in 90% RPMI and 10% FCS (Hyclone, Logan, USA) supplemented with penicillin G and streptomycin. The BJAB cell line was kindly provided by Myung Soo Kang (Samsung Medical Center, Sungkyunkwan University, Seoul). Other cell lines were obtained from the American Type Culture Collection. Monthly tests were conducted for mycoplasma sp. and other contaminants.

### Antibodies

The following antibodies were used: an anti-BCL6 (LN22) antibody (Novocastra, Newcastle, UK); anti-Blimp-1 (C14A4), anti-BCL6, anti-TAK1, anti-MyD88 (D80F5), anti-I $\kappa$ B $\alpha$  (L35A5), anti-p105, anti-p100, anti-Rel B, anti-p65, anti-p52, and anti-PI3K antibodies (Cell Signaling Technologies, MA, USA); anti-PELI1 (F-7), anti-MUM1/IRF4 (M-17), anti-BCL2 (C21), anti-TRAF6 (H-274), anti-p38 $\beta$  (C-16), anti-ERK1/2, and anti-CyclinD1 antibodies (Santa Cruz Biotechnology, CA, USA); an anti-RIP1 antibody (BD Biosciences, CA, USA); an anti-HA (3F10) antibody (Roche, Mannheim, Germany); an anti-Actin antibody (Sigma-Aldrich, MO, USA); an anti-Myc antibody (Bethyl Laboratories, TX, USA); anti-Lamin B1, anti-Ki67, anti-CD10 and anti-BCL2 (Abcam, Cambridge, UK) antibodies; anti-Foxp1 (Cell Marque, CA, USA); an APC-labeled anti-CD45R (B220) or anti-CD86 antibody, a PE-labeled anti-CD3e antibody, an FITC-labeled anti-MHC class II or anti-BCL2 antibody, a PE-labeled anti-BCL6 antibody, an APC-labeled anti-IgD (11-26C) or anti-B220 (RA3-6B2) antibody and anti-CD20, anti-CD23, and anti-CD43 (eBioR2/60) antibodies, an FITC-labeled anti-B220 antibody, and a PerCP-eF710-labeled anti-IgM (II/41) antibody (eBioscience, CA, USA); and an anti-IgM ( $\mu$ -chain specific) antibody (Jackson ImmunoResearch, PA, USA).

### Plasmid construction, cell culture, transfection, and drug treatment

The full length cDNA sequence of the human PELI1 protein was PCR amplified using oligo-dT primers. Peli1 $\Delta$ C included N-terminal 280 amino acids and lacked the C-terminal RING domain (1). PELI1 and PELI1  $\Delta$ C were subcloned into Myc-, GST-, or His<sub>6</sub>-tagged fusion plasmids. pMSCV-BCL6-IRES-GFP (Addgene, MA, USA) was subcloned into HA- or GST-

tagged fusion plasmids. For shRNA synthesis, the following gene-specific sequences were generated using the pSuper vector (Oligoengine, WA, USA): the PELI1 shRNA [targeting open reading frame (ORF)] 5'-GGGTTCAACACACTAGCAT-3', 3'untranslated region (UTR) PELI1 shRNA 5'-GCTCCTTTGGATATGCAATTT-3', and the Luciferase shRNA 5'-CTACGCGGAATACTTCGA-3'. B-cell lines were grown in the RPMI1640 medium. HeLa cells and HEK-293 T cells were maintained in Dulbecco's Modified Eagle's Medium (DMEM) supplemented with 10% FBS (Hyclone) and pen/strep. For transient transfection, cells were electroporated using a microporator (Digital Biotechnology, Seoul, Korea) according to the manufacturer's instructions. The following drugs were used: 1 µg/ml LPS (Sigma-Aldrich), 25 µM MG132, and 100 µg/ml cycloheximide (A.G Scientific, CA, USA).

### **Flow cytometry and B-cell stimulation**

Samples were obtained from blood, bone marrow, the spleen, and lymph nodes. Erythrocytes were lysed, and single-cell suspensions were prepared in phosphate buffered saline (PBS) and stained with an anti-B220 APC or anti-CD3 PE antibody. Splenocytes were stimulated with an anti-IgM or anti-CD40 antibody and were stained with an anti-CD86 APC or anti-MHC class II FITC antibody. Data were obtained using the FACS Canto II flow cytometer (BD Biosciences).

### **Cell fractionation**

B220<sup>+</sup> B cells were isolated from splenocytes of wild-type or PELI1 Tg mice by using magnetic beads (Miltenyi Biotec, CA, USA) and cultured in the presence of LPS (1 µg/ml) for indicated time periods. To separate the cytoplasm and nuclei, cells were harvested and suspended in cold hypotonic buffer (HB; 10 mM Hepes, pH7.9, 10 mM KCl, 0.2 mM EDTA, 1 mM DTT, 1x protease inhibitor mixture, 0.25 mM PMSF). After incubation on ice for 15 min, NP-40 was added to a final concentration of 0.5%. Nuclei were recovered by centrifugation at 13,000 rpm for 30 s. Supernatants were collected as cytoplasmic extracts. The pellet was washed once with buffer HB, and proteins were extracted by adding high-salt (HS) buffer (20 mM Hepes, pH7.9, 420 mM NaCl, 2 mM EDTA, 1 mM DTT, 1x protease inhibitor mixture, 0.25 mM PMSF), followed by incubation at 4°C for 30 min. The mixture was spun at 13,000 rpm for 15 min, and the supernatant was collected as a nuclear extract.

### **Retrovirus-mediated gene transfer and bone-marrow transplantation**

To generate retroviruses expressing GFP or GFP-fused PELI1, 293T cells were transfected with the replication-incompetent helper vector pCL-Eco and pMSCV-HA-IRES-GFP or pMSCV-HA Peli1-IRES-GFP expression plasmids. Supernatants were collected, passed through 0.45  $\mu\text{m}$  filters, and frozen in aliquots at  $-80^{\circ}\text{C}$ . Retroviral titers were determined by measuring the percentage of GFP-positive 3T3 cells. Bone marrow cells were obtained by flushing the tibia and femur with RPMI 1640 supplemented with 10% fetal bovine serum (FBS). Purified bone marrow cells were pre-incubated overnight in the 20% FBS/RPMI1640 medium supplemented with 5 ng/ml murine IL-3 (R & D Systems, MN, USA), 10 ng/ml murine IL-6 (R & D Systems), 50 ng/ml murine SCF (R & D Systems), and 50 ng/ml murine Flt3L (eBioscience). HSCs ( $1 \times 10^6$  cells) isolated from bone marrow were mixed with the retroviral supernatant and 8  $\mu\text{g/ml}$  polybrene (Sigma-Aldrich). After triplicate spin infection, retroviral supernatants were removed and replaced with the 20% FBS/RPMI 1640 medium supplemented with 5 ng/ml murine IL-3, 10 ng/ml murine IL-6, 50 ng/ml murine SCF, and 50 ng/ml murine Flt3L. C57BL/6J mice were irradiated using fractionated doses (4.5 Gy x 2 = 9 Gy; 3 h intervals) and then transplanted with infected HSC cells ( $4 \times 10^6$ ) through a tail vein injection.

### **Histopathology**

Tissue samples were fixed in 10% neutral buffered formalin, embedded in paraffin, cut at various depths in serial sections 3-6  $\mu\text{m}$  thick, and stained with hematoxylin and eosin. Immunohistochemistry was performed using the Vectastain Elite ABC kit (Vector Laboratories, MN, USA) according to the manufacturer's instructions. The following antibodies were used: anti-CD45R, anti-CD3, anti-Ki67, anti-BCL2, anti-BCL6, anti-CD20, and anti-CD23 antibodies (primary) and biotinylated anti-rat IgG and anti-rabbit IgG antibodies (secondary). Sections were then incubated with an avidin-biotin-horseradish peroxidase complex (Vectastain Elite ABC kit; Vector Laboratories), and peroxidase activity was visualized using a 3,3'-diaminobenzidine substrate kit (Vector Laboratories). Finally, tissue sections were counterstained with Harris Hematoxylin (BBC Biochemical, WA, USA), and microscopic images were captured using the AxioCam digital microscope camera and the AxioVision image processing software package (Carl Zeiss, Oberkochen, Germany). DLBCL patient samples were histologically examined using microsections stained with hematoxylin and eosin. Representative core samples 2 mm in diameter were taken from formalin-fixed, paraffin-embedded (FFPE) blocks to construct a tissue microarray. Immunohistochemical

staining for PELI1 was performed using the Leica BOND-MAX automated immunostainer (Leica Microsystems, Newcastle, UK), and that for BCL6 was performed using the BenchMark XT Slide Preparation System (Ventana Medical Systems, Tucson, AZ, USA). Microscopic images were captured using the DP72 digital camera mounted on the BX51 microscope (Olympus Corp, Tokyo, Japan).

### **Fluorescence in situ hybridization (FISH)**

A FISH analysis was conducted using serial sections 3  $\mu\text{m}$  thick from each TMA block. Here the Vysis LSI BCL6 dual-color break-apart probe (Abbott-Vysis, Wiesbaden-Delkenheim, Germany) was used. After deparaffinization and dehydration, slides were immersed in 0.2N HCl, boiled in a microwave in citrate buffer (pH 6.0), incubated in 1M NaSCN for 35 min at 80°C, immersed in a pepsin solution, and then fixed in 10% neutral-buffered formalin. The DNA probe set was applied to the slide and then incubated in a humidified chamber at 73°C for 5 min to co-denature the target DNA and probe and subsequently at 37°C for 19 h to achieve hybridization. After the post-hybridization washing, the slide was counterstained with 4', 6-diamidino-2-phenylindole (DAPI) and an anti-fade compound (*p*-phenylenediamine). At least 100 intact, non-overlapping nuclei were assessed under the Olympus BX51TRF microscope (Olympus) equipped with DAPI, green, orange, and triple-pass (DAPI/Green/Orange) filters (Abbott-Vysis). Here the positive predictive cutoff value was 10% of suspected tumor cells.

### **ELISA**

For the detection of various serum cytokines, plasma samples were collected from mice and immediately stored at -80°C in a freezer until the day of the assay. Novex®ELISA kits (for IL-6, IL-10, IL-12p40, and TNF- $\alpha$ ) were purchased from Invitrogen. All reagents were provided in the ELISA kit, and all procedures were performed according to the manufacturer's instructions. Plates were read at 450 nm by using the Spectra Max Plus<sup>384</sup> Microplate Reader (Molecular Devices, CA, USA).

### **In vitro binding and immunoprecipitation assays**

For the GST pull-down assay, fusion proteins were adsorbed onto glutathione-protein A/G-Sepharose beads (Amersham Biosciences, NJ, USA) and incubated with whole-cell extracts

from LPS- treated RL7 cells. Bound proteins were separated by 8% sodium dodecyl sulfate-polyacrylamide gel electrophoresis (SDS-PAGE) and analyzed by immunoblotting with an anti-BCL6 or anti-c-Rel antibody. For immunoprecipitation, transfected cells were treated with or without 2  $\mu\text{g/ml}$  LPS for 24 h, resuspended in immunoprecipitation buffer (150 mM NaCl, 20 mM HEPES, 5 mM EDTA, 0.5% Nonidet P-40, 1 mM phenylmethanesulfonyl fluoride, 10 mM NaF, 1 mM  $\text{Na}_3\text{VO}_4$ , 1 mM dithiothreitol supplemented with a mixture of protease inhibitors), and incubated at 4°C for 30 min. Then the cells were lysed by passing cell pellets five times through a 27-gauge needle. Lysates were centrifuged at 13,000 rpm for 30 min, and the insoluble debris was discarded. The lysates were then incubated with an anti-PELI1 antibody or normal IgG (control) and then with protein A/G agarose beads, which were later pelleted, washed three times in immunoprecipitation buffer, and analyzed by immunoblotting.

#### **In vivo and in vitro ubiquitination assays**

RL7 cells were transfected with an expression plasmid encoding Myc or Myc-tagged PELI1 and HA-tagged ubiquitin K63 (HA-Ub K63, kindly provided by Dr. Hong Tae Kim) in combination, as shown in Figure 5. Cells from each plate were collected into two aliquots. One aliquot (10%) was used for conventional immunoblotting, and the remaining cells (90%) were used for the immunoprecipitation of the BCL6 protein complex. Immunoprecipitates were washed three times with TNN buffer, and bound proteins were immunoblotted with indicated antibodies. Purified GST or GST-BCL6 (1  $\mu\text{g}$ ) was incubated with purified His-PELI1 or His-PELI1  $\Delta\text{C}$  (100 ng) in conjunction with E1 (50 ng UBE1; Boston Biochem, MA, USA), E2 (400 ng UncH13/Uev1a; Boston Biochem), and HA-tagged ubiquitin K63 (2  $\mu\text{g}$  HA-Ub K63; Boston Biochem) in ubiquitin reaction buffer composed of 5 mM Tris-HCl (pH 7.5), 2 mM  $\text{MgCl}_2$ , 2 mM ATP, and 100 mM NaCl. Reaction mixtures were incubated for 2 h at 37°C and analyzed by immunoblotting with an anti-BCL6 or anti-HA antibody and an anti-PELI1 antibody.

#### **Quantitative real-time PCR**

Total RNA was isolated using an RNeasy mini kit (QIAGEN, CA, USA) and cDNAs were synthesized using the QuantiTect Reverse Transcription kit (QIAGEN). qRT-PCR was performed with Rotor-Gene SYBR Green PCR kit (QIAGEN) using the Rotor-Gene Q 5plex PCR (QIAGEN) according to manufacturer instructions. Samples were assayed in duplicate,

and normalized to dual housekeeping gene (GAPDH; QT01658692 and Rn18s; QT02448075). All Primers (murine BCL6; QT01057196, Mme; QT00162589, Mybl1; QT01057637, LMO2; QT00115073, Entpd1; QT00099001, Ccnd2; QT00170618, IRF4; QT00109984, Pim1; QT00170541, Foxp1; QT01062929, Lrmp; QT00101101, Cxcr4; QT00249305, IL16; QT00116550) were purchased from QIAGEN. The heat-map was generated using the heatmap.2 package in R (<http://www.R-project.org>).

### **Statistical analysis**

Data were analyzed using the GraphPad Prism 4.5 software package (GraphPad Software, CA, USA) and presented as the mean  $\pm$ s.e.m. Spearman's correlation analysis was conducted to measure the strength of the linear relationship between PELI1 and BCL6 expression scores. PELI1 expression and clinicopathologic variables were compared through the  $\chi^2$  test or Fisher's exact test. Overall survival (OS) was defined as the period from the start of treatment to the date of the final follow-up or death from any cause. The OS rate of patients was estimated using the Kaplan-Meier method, and a log-rank test was conducted to compare differences. The p-value  $< 0.05$  was considered significant, and a statistical analysis was conducted using SPSS 12.0 and the IBM-SPSS Statistics software package (version 19.0; IBM Corporation).

### **Reference**

1. Lee YS, Kim JH, Kim ST, Kwon JY, Hong S, Kim SJ, and Park SH. Smad7 and Smad6 bind to discrete regions of Pellino-1 via their MH2 domains to mediate TGF-beta1-induced negative regulation of IL-1R/TLR signaling. *Biochem Biophys Res Commun.* 2010;393(4):836-843

### **Supplementary Figure Legends**

### **Supplementary Figure 1. Generation of *PELI1* transgenic mice**

(A) The vector construct used to generate conventional *PELI1*-transgenic (Tg) mice: CMV enh, human early cytomegalovirus enhancer; pA,  $\beta$ -globin gene polyadenylation sequence; Myc, Myc epitope. The vector was linearized, purified, and injected into the pronuclei of fertilized C57BL/6J mice. Among 14 pups derived from the quadruple embryo transfer, three pups (founder lines 2, 3, and 9) were positive based on the reverse-transcription-polymerase chain reaction (RT-PCR). (B) The transgene expression of *PELI1* transgenic founder (line #9) was determined through RT-PCR (upper) and an immunoblot analysis using anti-Myc and anti-Actin antibodies (bottom). The amplification of the ribosomal L32 mRNA by RT-PCR verified the presence of RNA in all samples. The PCR primers specific to the human *PELI1* gene were 5'-GCAATAAGCAACAAAG-3'(forward) and 5'-ATGAGTCAAATCCTGCAG-3'(reverse). (C) The transgene expression of *PELI1* transgenic founder (line #2) was determined through an immunoblot analysis using anti-*PELI1* and anti-Actin antibodies.

### **Supplementary Figure 2. *PELI1* expression led to impaired immune responses**

(A) A peripheral blood CBC analysis of the white blood cell, lymphocyte, and monocyte content of non-Tg (n = 9) and *PELI1*-Tg (n = 12) mice at 12-14 months (error bars represent the mean  $\pm$ s.e.m). (B) ELISA for serum cytokine concentrations in blood obtained from non-Tg and *PELI1*-Tg mice. Data are representative of two experiments with three mice per experiment (error bars represent the mean  $\pm$ s.e.m). Asterisks indicate significant differences based on a one-way ANOVA (\* $p < 0.05$ , \*\*  $p < 0.01$ , \*\*\*  $p < 0.001$ ); ns: not significant.

### **Supplementary Figure 3. The tumor incidence of mice overexpressing *PELI1* by bone marrow transplantation**

Total tumor incidences based on a macroscopic analysis of control GFP-transduced (n = 4) and GFP-*PELI1*-transduced (n = 5) mice (error bars represent the mean  $\pm$ s.e.m.). Data are representative of three independent experiments. Figure 3 provides detailed information on the bone marrow transplantation of hematopoietic stem cells expressing *PELI1*.

### **Supplementary Figure 4. An examination of the molecular mechanism of *PELI1*-induced B-cell lymphomagenesis**

(A) Splenic B220<sup>+</sup> cells were isolated from non-Tg littermates and *PELI1*-Tg mice and maintained in the absence (-) or presence (+) of lipopolysaccharide (LPS). At 24 h after

treatment, splenic B220<sup>+</sup> cells were harvested, lysed, and subjected to immunoblotting for indicated proteins. **(B)** Splenic B220<sup>+</sup> cells were isolated from TetO-PELI1-rtTA mice, a doxycycline-inducible PELI1-Tg mice, maintained in the absence (-) or presence (+) of doxycycline, and further treated with LPS as indicated. Treated splenic B220<sup>+</sup> cells were lysed, separated into cytoplasmic (CE) and nuclear (NE) fractions, and immunoblotted with anti-IkB $\alpha$ , anti-p52, anti-p65, anti-100, anti-p105, anti-Rel B, anti-PELI1, anti-Lamin B (a marker for nuclear fractions), and anti-Actin (a marker for cytoplasmic fractions) antibodies as indicated.

### **Supplementary Figure 5. The polyubiquitinations of BCL6 by the PELI1 E3 ubiquitin ligase**

To compare the K63-mediated polyubiquitination of BCL6 by PELI1 through K48-mediated polyubiquitination, HeLa cells were transfected with Myc-PELI1, HA-BCL6, and HA-Ub wild-type K48 or K63 mutant expression plasmids. At 24 h after transfection, cells were treated with LPS for 18 h and harvested for immunoprecipitation with an anti-BCL6 antibody. The BCL6 protein complex was subjected to immunoblotting with anti-Ubiquitin, anti-BCL6, and anti-PELI1 antibodies. The overexpression of HA-Ub K63 with Myc-PELI1 clearly induced the appearance of high-molecular-mass species of BCL6 polypeptides, whereas the overexpression of HA-Ub K48 weakly polyubiquitinated BCL6.

### **Supplementary Figure 6. A comparison of B-cell development between young and old PELI1-Tg mice**

Populations of B220<sup>+</sup> B cells (B220) and CD3<sup>+</sup> T cells (CD3) were measured by flow cytometry using cells isolated from the spleen and lymph nodes of young (6 weeks of age) and old (14 months of age) non-Tg and PELI1-Tg mice measured by flow cytometry. Data are representative of three independent experiments with three mice per experiment (mean  $\pm$  s.e.m). ns: not significant.

### **Supplementary Figure 7. The detailed gene expression analysis on PELI1-induced lymphoid tumors.**

qRT-PCR analysis of gene expression in the spleen of non-Tg (n = 9) and PELI1-Tg mice (n = 9). A group of genes characteristic of GCB and post-GCB (or ABC-like) subtypes are selected for analysis as indicated (2, 3). Relative mRNA expression in non-Tg mice is set to



be 1 after normalization with GAPDH and Rn18S levels. The relative fold changes ratio of GCB and post-GCB transcripts in PELI1-Tg sample as compared to non-Tg sample is  $\log_2$  transformed and displayed in a heat-map. A filter was applied to categorize genes with fold changes, greater (dark blue) or lower (light blue) than zero.

**Supplementary Figure 8. The frequency of the 5'noncoding-region mutation of the BCL6 gene in DLBCL patients.**

(A) Representative images of the DNA sequencing of the 5'noncoding region of the BCL6 gene based on genomic DNA isolated from paraffin sections of 69 DLBCL specimens. The BCL6 5'noncoding region spanning the first exon is shown in the upper diagram. The direct sequencing of the PCR product obtained from genomic DNA is shown in the lower diagrams. Arrows indicate the position of the mutation. F indicates forward sequencing, and R, reverse sequencing. For a mutational analysis of the BCL6 promoter region at the DNA level, the genomic fragment spanning 5'noncoding region was amplified using primers (+39 forward 5'-ACGCTCTGCTTATGAGGA -3' and reverse +300 5'-CGGCAGCAACAGCAATAA -3') (4). The PCR product was resolved on 1.2% agarose gels and visualized by ethidium bromide staining. The same amplicons were subsequently gel purified and sequenced. (B) The frequency of the 5'noncoding-region mutation of the BCL6 gene in 66 DLBCL specimens.

**Supplementary Figure 9. The overall survival rate according to PELI1 expression in the R-CHOP group with DLBCLs**

A Kaplan-Meier curve showing the overall survival (OS) rate for a cohort of 71 DLBCL patients treated with R-CHOP according to their PELI1 expression status. High-PELI1 cases were defined based on the intensity (2-3), extent (> 10%), and location (3) of PELI1 expression in tumor cells. Differences in the OS rate were analyzed through Kaplan-Meier method with the log-rank test. The sharp drop in the OS rate from 67% to 50% in the low-PELI1 group was likely due to poor survival responses of three patients after 85 months of treatment.

**Supplementary Figure 10. An analysis of IgH locus rearrangements in lymphoma-bearing PELI1 transgenic samples**

The rearrangement of the variable region of mouse IgH was analyzed (5). Genomic DNA was prepared from the spleen of PELI1-Tg or non-Tg mice by using a genomic DNA isolation kit

(QIAGEN). An analysis of the rearranged status of the IgH locus was conducted by PCR using the primers V<sub>H</sub>588 5'-CGAGCTCTCCAACACAGCCTACATGCAACTCAAC-3' and J<sub>H</sub>3 5'-GTCTAG ATTCTCACAAGAGTCCGATAGACCCTGG-3'. SM: standard DNA marker; N: non-transgenic spleen used as the control.

## References

2. Alizadeh AA, Eisen MB, Davis RE, Ma C, Lossos IS, Rosenwald A, Boldrick JC, Sabet H, Tran T, Yu X et al. Distinct types of diffuse large B-cell lymphoma identified by gene expression profiling. *Nature*. 2000;403(6769):503-511.
3. Wright G, Tan B, Rosenwald A, Hurt EH, Wiestner A, Staudt LM. A gene expression-based method to diagnose clinically distinct subgroups of diffuse large B cell lymphoma. *Proc Natl Acad Sci U S A*. 2003;100(17):9991-9996.
4. Pasqualucci L, Migliazza A, Basso K, Houldsworth J, Chaganti RS, and Dalla-Favera R. Mutations of the BCL6 proto-oncogene disrupt its negative autoregulation in diffuse large B-cell lymphoma. *Blood*. 2003;101(8):2914-2923.
5. Schlissel MS, Corcoran LM, and Baltimore D. Virus-transformed Pre-B cells show ordered activation but not inactivation of immunoglobulin gene rearrangement and transcription. *J Exp Med*. 1991;173(3):711-720.

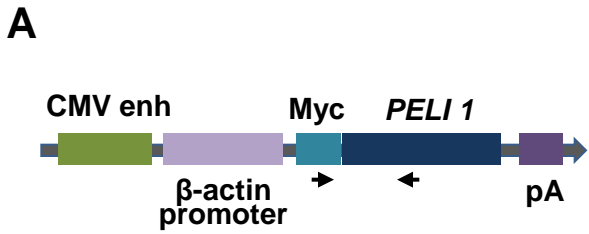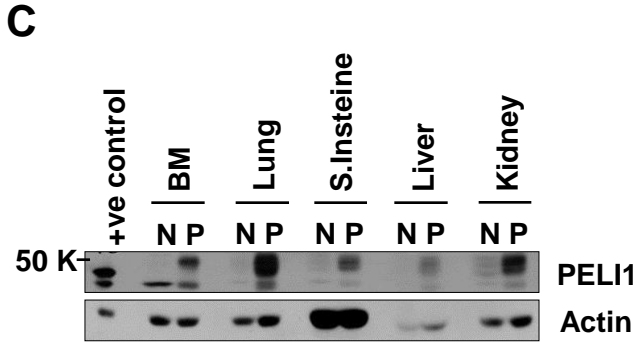

N, Non-Tg #5; P, PELI1-Tg #2

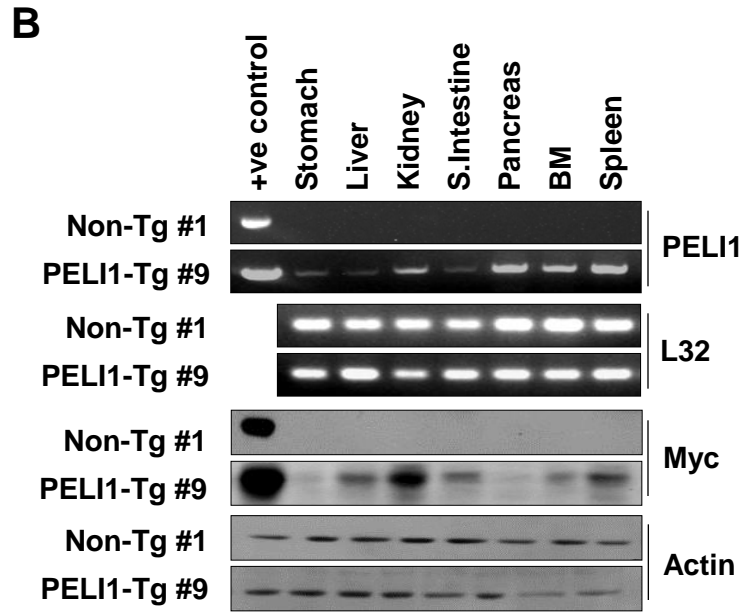

**A**

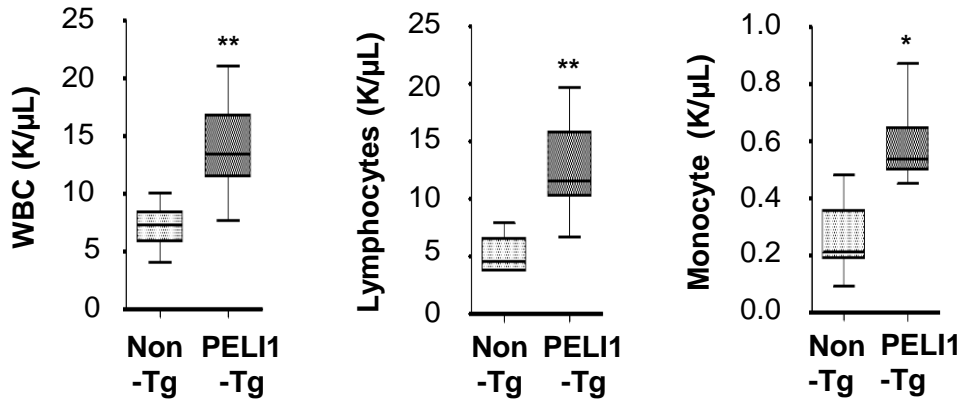

**B**

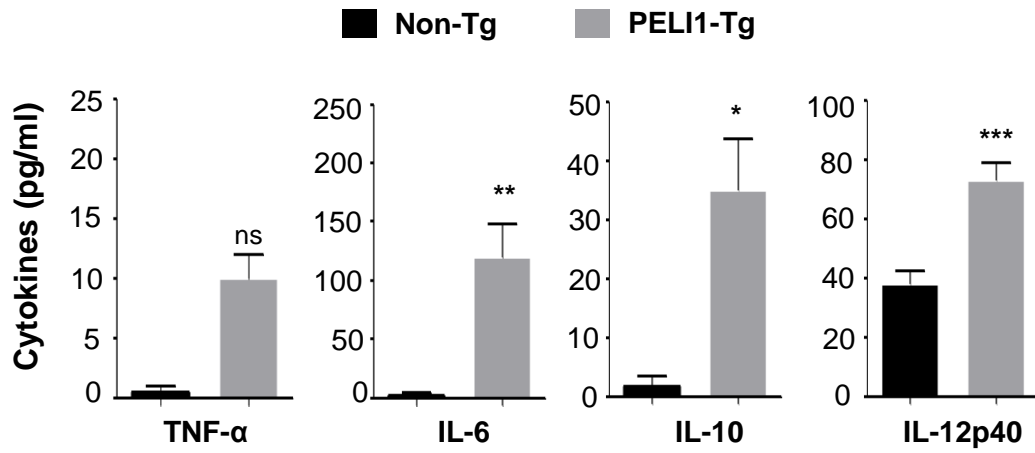

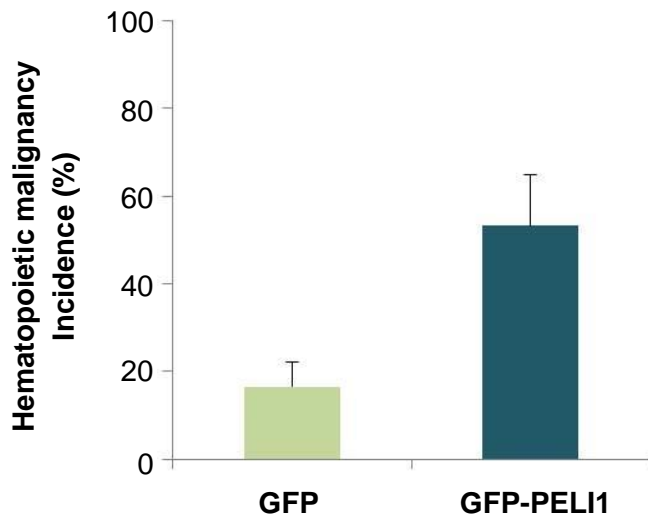

**A**

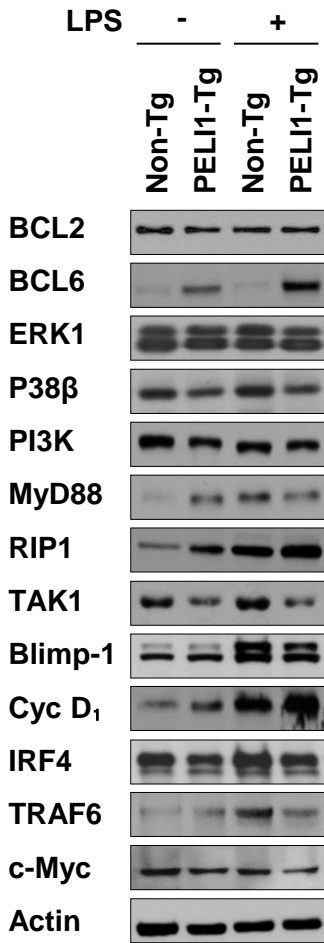

**B**

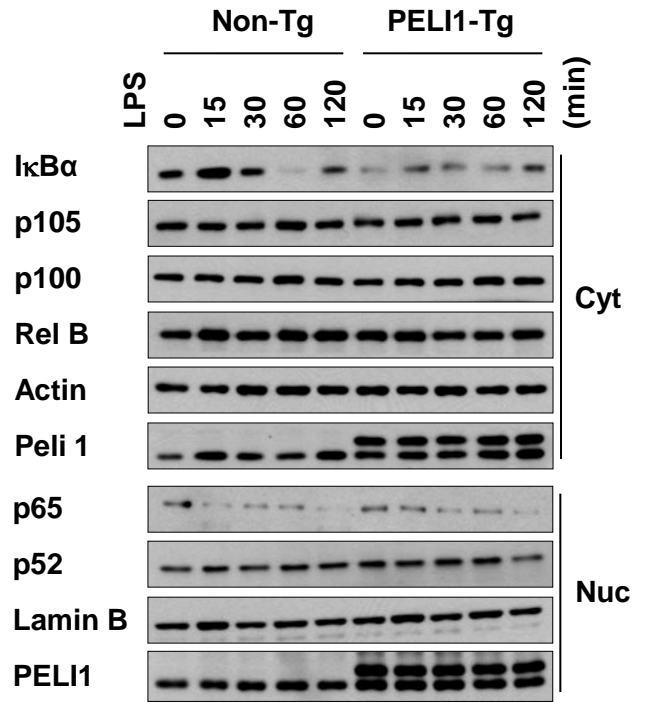

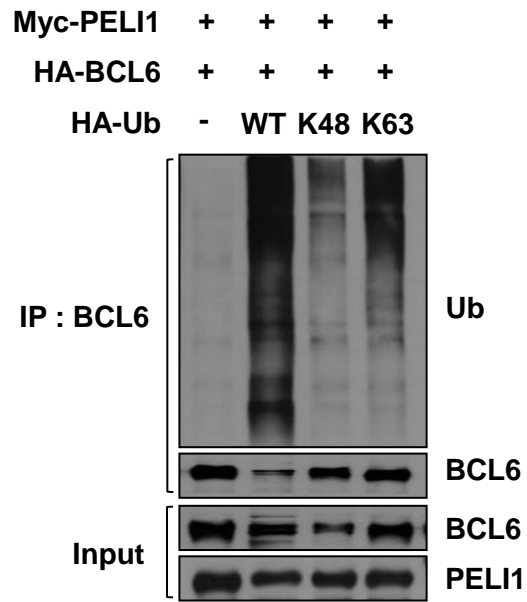

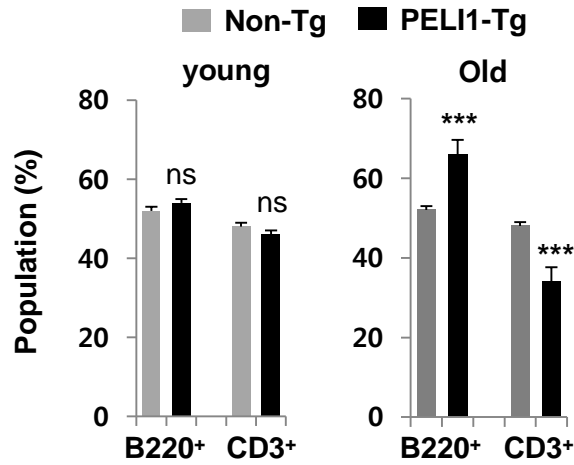

|                  |         |
|------------------|---------|
| age              | 6 weeks |
| tumors in spleen | -       |

|                  |           |
|------------------|-----------|
| age              | 14 months |
| tumors in spleen | +         |

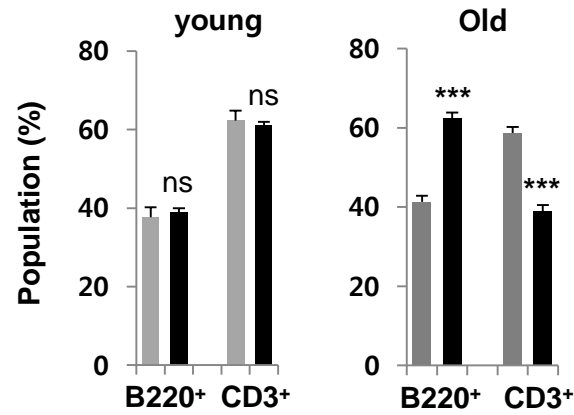

|               |         |
|---------------|---------|
| age           | 6 weeks |
| tumors in LNs | -       |

|               |           |
|---------------|-----------|
| age           | 14 months |
| tumors in LNs | +         |



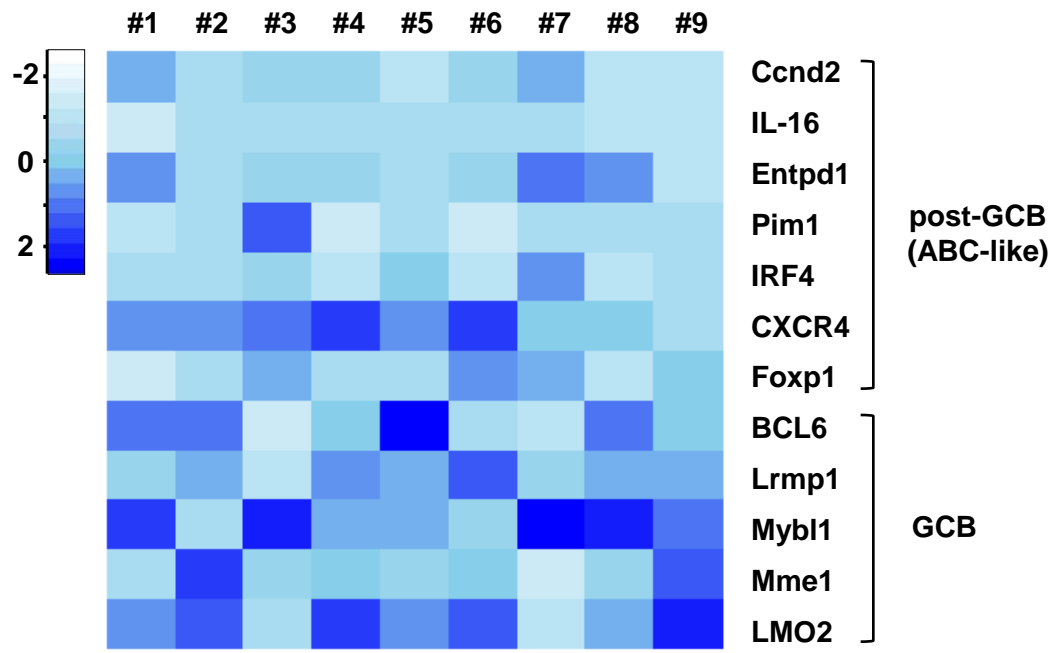

A

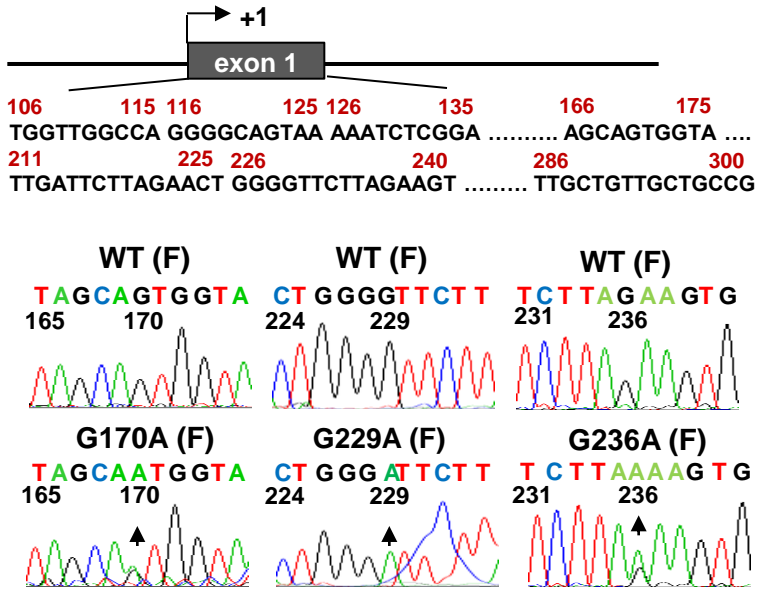

B

| Sequence       | Total |      |
|----------------|-------|------|
|                | (n)   | (%)  |
| Mutation G170A | 1/66  | 4.5  |
| Mutation G229A | 1/66  |      |
| Mutation C236A | 1/66  |      |
| No mutation    | 63/66 | 95.5 |

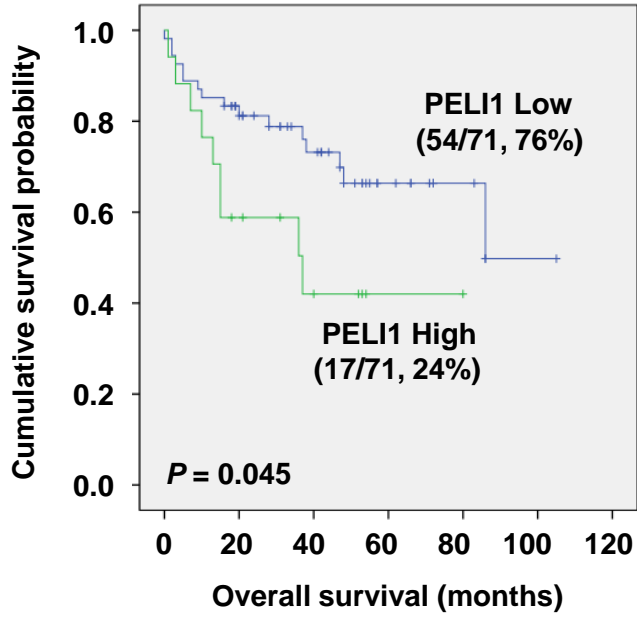

V<sub>H</sub>J588/J3

PELI1-Tg

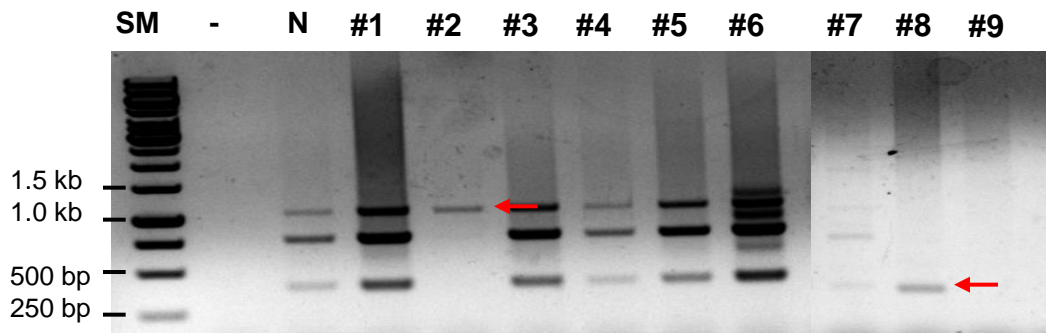

Supplementary Table 1. The identification of tumor cell types arose in the non-lymphoid organs of PELI1-Tg mice

| Total tumor incidence<br>(n = 49) | Tumor cell types        |           |
|-----------------------------------|-------------------------|-----------|
|                                   | Carcinomas and adenomas | Lymphomas |
| Liver<br>19 (39%)                 | 4 (22%)                 | 15 (78%)  |
| Lung<br>8 (16%)                   | 2 (25%) + 1 (12%)*      | 5 (63%)   |
| Intestine<br>7 (14%)              | 1 (14%) + 2 (29%)#      | 4 (57%)   |
| Pancreas<br>7 (14%)               | 2 (29%)                 | 5 (71%)   |
| Prostate<br>1 (2%)                | 1 (100%)                | 0 (0%)    |

\* Adenomas, # Tubular adenomas

## Supplementary Table 2 (Park et al)

Supplementary Table 2. Correlations of PELI1 expression with clinicopathologic features of DLBCL patients

|                         |                            | All              | PELI1 expression |                 | p-value |
|-------------------------|----------------------------|------------------|------------------|-----------------|---------|
|                         |                            |                  | Low              | High            |         |
|                         |                            | n = 113<br>n (%) | n = 85<br>n (%)  | n = 28<br>n (%) |         |
| Age                     | Mean (range)               | 57.7 (8-86)      | 57.3 (8-86)      | 58.9 (12-82)    | 0.626   |
|                         | < 60                       | 44 (51.8)        | 10 (35.7)        | 54 (47.8)       | 0.140   |
|                         | ≥ 60                       | 41 (48.2)        | 18 (64.3)        | 59 (52.2)       |         |
| Sex                     | Male                       | 46 (54.1)        | 16 (57.1)        | 62 (54.9)       | 0.78    |
|                         | Female                     | 39 (45.9)        | 12 (42.9)        | 51 (45.1)       |         |
| Primary site            | Nodal                      | 20 (23.5)        | 9 (32.1)         | 29 (25.7)       | 0.365   |
|                         | Extranodal                 | 65 (76.5)        | 19 (67.9)        | 84 (74.3)       |         |
| Stage                   | 1, 2                       | 50 (61)          | 13 (46.4)        | 63 (57.3)       | 0.179   |
|                         | 3, 4                       | 32 (39)          | 15 (53.6)        | 47 (42.7)       |         |
| B symptom               | Absent                     | 65 (79.3)        | 22 (78.6)        | 87 (79.1)       | 0.938   |
|                         | Present                    | 17 (20.7)        | 6 (21.4)         | 23 (20.9)       |         |
| Bulky disease           | Absent                     | 70 (85.4)        | 23 (82.1)        | 93 (84.5)       | 0.684   |
|                         | Present                    | 12 (14.6)        | 5 (17.9)         | 17 (15.5)       |         |
| ECOG performance status | 0, 1                       | 72 (87.8)        | 16 (59.3)        | 88 (80.7)       | 0.001   |
|                         | ≥ 2                        | 10 (12.2)        | 11 (40.7)        | 21 (19.3)       |         |
| LDH                     | Normal                     | 37 (51.4)        | 7 (28)           | 44 (45.4)       | 0.043   |
|                         | Elevated                   | 35 (48.6)        | 18 (72)          | 53 (54.6)       |         |
| No. of extranodal sites | 0, 1                       | 64 (78)          | 22 (81.5)        | 86 (78.9)       | 0.705   |
|                         | ≥ 2                        | 18 (22)          | 5 (18.5)         | 23 (21.1)       |         |
| BM involvement          | Absent                     | 70 (89.7)        | 21 (80.8)        | 91 (87.5)       | 0.231   |
|                         | Present                    | 8 (10.3)         | 5 (19.2)         | 13 (12.5)       |         |
| IPI group               | Low to intermediated (0-2) | 50 (68.5)        | 15 (57.7)        | 65 (65.7)       | 0.319   |
|                         | High (3-5)                 | 23 (31.5)        | 11 (42.3)        | 34 (34.3)       |         |
| BLC6 translocation      | Absent                     | 87 (77)          | 62 (72.9)        | 25 (89.3)       | 0.118*  |
|                         | Present                    | 26 (23)          | 23 (27.1)        | 3 (10.7)        |         |
| Choi classifier         | GCB                        | 22 (29.7)        | 10 (38.5)        | 32 (32.0)       | 0.412   |
|                         | ABC                        | 52 (70.3)        | 16 (61.5)        | 68 (68.0)       |         |
| EBV ISH                 | Negative                   | 71 (94.7)        | 26 (96.3)        | 97 (95.1)       | 0.737   |
|                         | Positive                   | 4 (5.3)          | 1 (3.7)          | 5 (4.9)         |         |

\*Fisher exact test; ECOG, Eastern Cooperative Oncology Group; LDH, lactate dehydrogenase; BM, bone marrow; IPI, international prognostic index; GCB, germinal center B-cell-like; ABC, activated B cell-like; EBV ISH, Epstein-Barr virus In situ hybridization

## Supplementary Table 3 (Park et al)

Supplementary Table 3. Pearson correlation coefficients between PELI1 and BCL6 expression in GCB and non-GCB patients

| <b>GCB patients<br/>35/102 (34%)</b>      |                     | <b>BCL6<br/>Intensity X Extent</b> | <b>PELI1<br/>Intensity X Extent<br/>X Location</b> |
|-------------------------------------------|---------------------|------------------------------------|----------------------------------------------------|
| BCL6<br>Intensity X Extent                | Pearson correlation | 1                                  | 0.341*                                             |
|                                           | Sig. (2-tailed)     |                                    | 0.045                                              |
|                                           | N                   | 35                                 | 35                                                 |
| PELI1<br>Intensity X Extent X<br>Location | Pearson correlation | 0.341*                             | 1                                                  |
|                                           | Sig. (2-tailed)     | 0.045                              |                                                    |
|                                           | N                   | 35                                 | 35                                                 |

\*Correlation is significant at the 0.05 level (2-tailed).

| <b>non-GCB patients<br/>67/102 (66%)</b>  |                     | <b>BCL6<br/>Intensity X Extent</b> | <b>PELI1<br/>Intensity X Extent<br/>X Location</b> |
|-------------------------------------------|---------------------|------------------------------------|----------------------------------------------------|
| BCL6<br>Intensity X Extent                | Pearson correlation | 1                                  | 0.542**                                            |
|                                           | Sig. (2-tailed)     |                                    | < 0.001                                            |
|                                           | N                   | 67                                 | 67                                                 |
| PELI1<br>Intensity X Extent X<br>Location | Pearson correlation | 0.542**                            | 1                                                  |
|                                           | Sig. (2-tailed)     | < 0.001                            |                                                    |
|                                           | N                   | 67                                 | 67                                                 |

\*\*Correlation is significant at the 0.01 level (2-tailed). Sig, significant

## Supplementary Table 4 (Park et al)

Supplementary Table 4. Multivariate overall survival analysis in all patients with DLBCL

| Variable                            | Category             | Univariate analysis |             |             | Multivariate analysis |             |             |
|-------------------------------------|----------------------|---------------------|-------------|-------------|-----------------------|-------------|-------------|
|                                     |                      | HR                  | 95% CI      | P-value     | HR                    | 95% CI      | p-value     |
| <b>Comparison with risk factors</b> |                      |                     |             |             |                       |             |             |
| PEL11                               | Low vs. High         | 2.576               | 1.338-4.957 | 0.005       | 3.745                 | 1.674-8.376 | 0.001       |
| Age, years                          | < 60 vs. ≥ 60        | 2.671               | 1.324-5.390 | 0.006       | -                     | -           | -           |
| Sex                                 | Male vs. Female      | 0.780               | 0.409-1.486 | 0.450       | -                     | -           | -           |
| Primary site                        | Nodal vs. Extranodal | 0.586               | 0.299-1.146 | 0.118       | -                     | -           | -           |
| Stage                               | 1, 2 vs. 3, 4        | 3.233               | 1.665-6.279 | 0.001       | 6.055                 | 2.392-15.33 | <0.001      |
| B symptom                           | Absent vs. Present   | 2.299               | 1.157-4.568 | 0.017       | -                     | -           | -           |
| Bulky disease                       | Absent vs. Present   | 1.034               | 0.432-2.475 | 0.941       | -                     | -           | -           |
| Performance status                  | 0, 1 vs. ≥ 2         | 3.097               | 1.553-6.175 | 0.001       | -                     | -           | -           |
| LDH                                 | Normal vs. Elevated  | 4.006               | 1.812-8.857 | 0.001       | -                     | -           | -           |
| No. of extranodal sites             | 0, 1 vs. ≥ 2         | 0.988               | 0.434-2.250 | 0.977       | -                     | -           | -           |
| Bone marrow involvement             | Absent vs. Present   | 1.598               | 0.663-3.853 | 0.297       | -                     | -           | -           |
| BCL6 translocation                  | Absent vs. Present   | 0.344               | 0.122-0.971 | 0.044       | -                     | -           | -           |
| EBV ISH                             | Absent vs. Present   | 1.763               | 0.421-7.371 | 0.438       | -                     | -           | -           |
| <b>Comparison with IPI group</b>    |                      |                     |             |             |                       |             |             |
| All patients*                       | Peli 1               | Low vs. High        |             |             | 2.443                 | 1.243-4.803 | 0.010       |
|                                     | IPI score            | 0 - 2 vs. 3 - 6     | 4.309       | 2.179-8.521 | <0.001                | 4.029       | 2.033-7.988 |
| R-CHOP group**                      | Peli 1               | Low vs. High        |             |             | 2.165                 | 0.930-5.041 | 0.073       |
|                                     | IPI score            | 0 - 2 vs. 3 - 6     |             |             | 2.818                 | 1.224-6.488 | 0.015       |

HR, hazard ratio; CI, confidence interval; LDH, lactate dehydrogenase; IPI, international prognostic index; EBV ISH, Epstein-Barr virus In situ hybridization. \*Multivariate overall survival analysis in all patients with DLBCL.

\*\*Multivariate overall survival analysis in R-CHOP group with DLBCL.
